# Supplementary material
Source: PubMed Central journal article supplement (PMC7116227)
Supplement: EMS96614-supplement-Tables_S1_S10_S12_15.pdf [file EMS96614-supplement-Tables_S1_S10_S12_15.pdf]

***New Phytologist* Supporting Information**

Article title: The honeysuckle genome provides insight into the molecular mechanism of carotenoid metabolism underlying dynamic flower coloration

Authors: Xiangdong Pu, Zhen Li, Ya Tian, Ranran Gao, Lijun Hao, Yating Hu, Chunnian He, Wei Sun, Meimei Xu, Reuben J. Peters, Yves Van de Peer, Zhichao Xu, Jingyuan Song

Article acceptance date: 12 March 2020

**Table S1.** Primers used for qPCR analysis.

| Gene              | Primer                 |
|-------------------|------------------------|
| <i>Actin-F3</i>   | CGACTACGAGCAAGAACTTGA  |
| <i>Actin-R3</i>   | CGAACCACCACTAAGCACAA   |
| <i>PSY1-F2</i>    | GAGAAGATGCCAGAAGAGGAAG |
| <i>PSY1-R2</i>    | TGCCGATACAACAACAATGATG |
| <i>PDS1-F3</i>    | ATTCACGGCGGAGGATGT     |
| <i>PDS1-R3</i>    | CACTCACCAATGCCAAATGC   |
| <i>PDS3-F1</i>    | ACTCTTGCCTGCCATTCTTG   |
| <i>PDS3-R1</i>    | TGAACCGTGCTTCTCCTGA    |
| <i>ZISO-1-F1</i>  | TTACTAGAGGTAGCGGCTGTT  |
| <i>ZISO-1-R1</i>  | CCAACCTTCTGTCTCCATTCC  |
| <i>ZISO-2-F3</i>  | GCAATACGATATGGCGAGGAT  |
| <i>ZISO-2-R3</i>  | CATAAGTGGGTGAGCAAGGTAT |
| <i>ZDS1-F3</i>    | AGCAATGAAGGACATACGGAAT |
| <i>ZDS1-R3</i>    | CTTAGTCGCAAACAACGAGAAA |
| <i>ZDS2-F1</i>    | GCACACGCACAAGTATCCA    |
| <i>ZDS2-R1</i>    | TTTCTAATGGGACCGCTCAAAT |
| <i>CRTISO1-F2</i> | CACTTGAGGAGCCAATCTACC  |
| <i>CRTISO1-R2</i> | ACACTCAGCATCTATGAAGGAC |
| <i>CRTISO2-F1</i> | TGGACTATGTTGTGGAGGACTA |
| <i>CRTISO2-R1</i> | TACTTGGCACATGGAATTGACT |
| <i>LCYE-F2</i>    | AGGAGGTCATTCCAAGAACATG |
| <i>LCYE-R2</i>    | GGCGAACAAGGCACATTCT    |
| <i>CYP97A3-F1</i> | GTCCGCTCGTATTGCTTCC    |
| <i>CYP97A3-R1</i> | ACCATAGGTGAGGTAGAGTTCA |
| <i>CYP97C1-F2</i> | ATAGACTTGCTGCTGGACCTA  |
| <i>CYP97C1-R2</i> | TTCTTGTGAAGTGATGGAACCA |
| <i>CYP97B3-F1</i> | GATGACCTGATGACGATGCTTA |
| <i>CYP97B3-R1</i> | TGAGGATACAACCGCAGAGT   |
| <i>LCYB-F1</i>    | TTGGAGAAGAGGCGGACAA    |
| <i>LCYB-R1</i>    | GGAACAGGACACTTGGTAACA  |
| <i>CCD4-F1</i>    | CGACTAACGGCATTGGCTTA   |
| <i>CCD4-R1</i>    | TGAGGTACGGCGGAATAGG    |
| <i>BCH-F1</i>     | CTCCATTCTCACGCCCTCT    |
| <i>BCH-R1</i>     | CTTCTCGCAATCTTCTCCTC   |
| <i>ZEP-F1</i>     | AGAGGACTTCCAGTGACAAGA  |
| <i>ZEP-R1</i>     | CGTATTCCATCAGCACCAACT  |
| <i>NSY-F1</i>     | CCTGATACAATGCGGCTCAT   |
| <i>NSY-R1</i>     | CCTCGTCTCGATTCTGTTCTC  |
| <i>NCED3-F2</i>   | GGAACCAGACACCGATGAAG   |
| <i>NCED3-R2</i>   | GCTTCCAGATTCACCTGTTCA  |

**Table S2.** Illumina short-read platform sequencing data.

| DNA Libraries | Insert size | Raw reads   | Base pairs     | Coverage (×) |
|---------------|-------------|-------------|----------------|--------------|
| Lib1          | 250 bp      | 152,805,538 | 22,920,830,700 | 31           |
| Lib2          | 500 bp      | 183,799,894 | 27,569,984,100 | 26           |
| Total         |             | 336,605,432 | 50,490,814,800 | 57           |

| cDNA libraries     | Raw reads     | Base pairs      |
|--------------------|---------------|-----------------|
| Stem 1             | 42,081,900    | 6,312,285,000   |
| Stem 2             | 51,523,748    | 7,728,562,200   |
| Stem 3             | 48,658,368    | 7,298,755,200   |
| Leaf 1             | 43,469,642    | 6,520,446,300   |
| Leaf 2             | 45,951,270    | 6,892,690,500   |
| Leaf 3             | 45,988,356    | 6,898,253,400   |
| juvenile bud 1     | 45,443,312    | 6,816,496,800   |
| juvenile bud 2     | 50,340,778    | 7,551,116,700   |
| juvenile bud 3     | 45,631,772    | 6,844,765,800   |
| third green 1      | 48,954,060    | 7,343,109,000   |
| third green 2      | 47,367,982    | 7,105,197,300   |
| third green 3      | 49,038,472    | 7,355,770,800   |
| second white 1     | 54,644,630    | 8,196,694,500   |
| second white 2     | 50,539,752    | 7,580,962,800   |
| second white 3     | 42,594,592    | 6,389,188,800   |
| silver flowering 1 | 50,400,598    | 7,560,089,700   |
| silver flowering 2 | 41,648,340    | 6,247,251,000   |
| silver flowering 3 | 41,494,904    | 6,224,235,600   |
| gold flowering 1   | 42,125,280    | 6,318,792,000   |
| gold flowering 2   | 39,627,268    | 5,944,090,200   |
| gold flowering 3   | 48,516,140    | 7,277,421,000   |
| tawny withering 1  | 43,238,934    | 6,485,840,100   |
| tawny withering 2  | 46,640,496    | 6,996,074,400   |
| tawny withering 3  | 47,658,704    | 7,148,805,600   |
| Total              | 1,113,579,298 | 167,036,894,700 |

**Table S3.** ONT sequencing data.

| Libraries | Total<br>Bases | Reads | Total Reads<br>Number | Pass<br>Bases | Reads | Pass Reads<br>Number | Pass<br>Mean Length | Reads | Pass<br>N50 Length | Reads | Pass<br>Medium<br>Length | Reads | Pass<br>Max Length | Reads | Pass<br>Avg Score | Reads |
|-----------|----------------|-------|-----------------------|---------------|-------|----------------------|---------------------|-------|--------------------|-------|--------------------------|-------|--------------------|-------|-------------------|-------|
| 1         | 5879,326,908   |       | 355,362               | 5,567,193,728 |       | 327,565              | 16,995              |       | 24,318             |       | 14,567                   |       | 106,401            |       | 9.94              |       |
| 2         | 3,024,839,126  |       | 166,338               | 2,817,113,983 |       | 149,362              | 18,860              |       | 26,230             |       | 16,159                   |       | 123,820            |       | 9.64              |       |
| 3         | 2,710,145,920  |       | 148,421               | 2,538,825,634 |       | 135,086              | 18,794              |       | 26,296             |       | 16,167                   |       | 132,565            |       | 9.72              |       |
| 4         | 3,427,083,357  |       | 191,340               | 3,199,279,777 |       | 171,905              | 18,610              |       | 26,180             |       | 15,897                   |       | 117,282            |       | 9.57              |       |
| 5         | 2,885,425,463  |       | 163,108               | 2,745,125,267 |       | 150,805              | 18,203              |       | 25,751             |       | 15,523                   |       | 143,663            |       | 10.64             |       |
| 6         | 1,518,023,393  |       | 80,335                | 1,424,153,489 |       | 73,599               | 19,350              |       | 27,090             |       | 16,701                   |       | 131,977            |       | 9.61              |       |
| 7         | 2,829,332,717  |       | 156,254               | 2,645,314,024 |       | 142,007              | 18,628              |       | 26,574             |       | 15,902                   |       | 141,804            |       | 9.71              |       |
| 8         | 7,384,681,101  |       | 412,207               | 7,045,681,813 |       | 384,200              | 18,338              |       | 25,972             |       | 15,841                   |       | 139,097            |       | 9.86              |       |
| 9         | 4,631,179,079  |       | 255,503               | 4,245,985,233 |       | 223,767              | 18,975              |       | 26,617             |       | 16,368                   |       | 122,956            |       | 9.53              |       |
| 10        | 3,874,346,262  |       | 214,031               | 3,530,219,951 |       | 186,452              | 18,933              |       | 26,421             |       | 16,327                   |       | 126,643            |       | 9.51              |       |
| 11        | 2,142,361,314  |       | 116,474               | 2,038,838,557 |       | 106,986              | 19,057              |       | 27,101             |       | 16,289                   |       | 134,984            |       | 9.76              |       |
| 12        | 2,422,168,685  |       | 130,134               | 2,245,960,528 |       | 116,371              | 19,300              |       | 27,185             |       | 16,523                   |       | 128,406            |       | 9.69              |       |
| 13        | 2,342,082,471  |       | 131,594               | 2,180,322,014 |       | 119,589              | 18,231              |       | 26,740             |       | 15,407                   |       | 121,670            |       | 9.63              |       |
| 14        | 2,488,677,599  |       | 135,885               | 2,311,334,250 |       | 122,364              | 18,889              |       | 26,927             |       | 16,115                   |       | 125,633            |       | 9.70              |       |
| 15        | 4,053,495,173  |       | 215,941               | 3,787,895,691 |       | 195,475              | 19,377              |       | 27,088             |       | 16,658                   |       | 131,956            |       | 9.58              |       |

|    |               |         |               |         |        |        |        |         |      |
|----|---------------|---------|---------------|---------|--------|--------|--------|---------|------|
| 16 | 1,534,238,056 | 87,476  | 1,432,007,518 | 78,816  | 18,168 | 25,898 | 15,376 | 122,340 | 9.54 |
| 17 | 3,970,592,801 | 212,397 | 3,619,139,761 | 186,190 | 19,437 | 27,516 | 16,639 | 149,370 | 9.61 |
| 18 | 2,592,348,297 | 137,431 | 2,409,689,036 | 122,332 | 19,697 | 27,583 | 16,896 | 129,289 | 9.57 |
| 19 | 2,033,862,834 | 109,512 | 1,872,266,341 | 97,014  | 19,298 | 27,068 | 16,630 | 129,171 | 9.73 |
| 20 | 2,256,462,232 | 121,414 | 2,103,995,200 | 109,161 | 19,274 | 27,205 | 16,417 | 142,250 | 9.75 |
| 21 | 7,438,331,763 | 411,887 | 6,842,971,479 | 366,385 | 18,676 | 26,212 | 15,974 | 139,752 | 9.54 |
| 22 | 7,367,350,080 | 395,807 | 6,936,254,856 | 359,879 | 19,273 | 27,112 | 16,571 | 125,505 | 9.97 |

---

**Table S4.** *L. japonica* genome assembly statistics.

|                             | CANU+<br>SMARTdenovo | CANU+<br>SMARTdenovo+<br>pilon 3× | CANU+<br>SMARTdenovo+<br>pilon 3× + Hi-C |
|-----------------------------|----------------------|-----------------------------------|------------------------------------------|
| Input Data                  | ONT                  | ONT+HiSeq                         | ONT+HiSeq+smHi-C                         |
| Genome Size (bp)            | 892,974,210          | 903,735,777                       | 843,177,289                              |
| Contigs                     | 919                  | 919                               | -                                        |
| Contig N50 (bp)             | 2,116,620            | 2,148,893                         | -                                        |
| Largest Contig (bp)         | 19,355,532           | 19,544,413                        | -                                        |
| Scaffolds                   | -                    | -                                 | 9                                        |
| Scaffolds N50 (bp)          | -                    | -                                 | 84,431,753                               |
| Largest Scaffold (bp)       | -                    | -                                 | 125,163,164                              |
| N bases in scaffolds (%)    | 0                    | 0                                 | 0.16%                                    |
| Completeness BUSCOs         | 57.1%                | 94.7%                             | 97.0%                                    |
| complete single-copy BUSCOs | 54.4%                | 90.5%                             | 92.6%                                    |
| complete duplicated BUSCOs  | 2.7%                 | 4.2%                              | 4.4%                                     |

**Table S5.** *L. japonica* genome annotation using sequence from different sequencing platforms.

---

| <b>Annotation</b>                             |                                          |
|-----------------------------------------------|------------------------------------------|
| No. of predicted coding genes                 | 33,961                                   |
| Average gene length (bp)                      | 1 458                                    |
| GC content (%)                                | 43.5                                     |
| Percentage of whole gene length in genome (%) | 4.2                                      |
| Masked repeat sequence length (bp)            | 526,123,083                              |
| Percentage of repeat sequences in genome (%)  | 58.21%                                   |
| BUSCO assessment                              | C:90.9% [S:87.2%,D:3.7%], F:2.3%, M:6.8% |

---

**Table S6.** Annotation of *L. japonica* transposable elements (TEs).

| Repeat Class                     | Elements number | Length (bp)        | Percentage of sequence |
|----------------------------------|-----------------|--------------------|------------------------|
| <b>RNA transposable elements</b> | <b>154,966</b>  | <b>262,416,892</b> | <b>29.03%</b>          |
| non-LTR(Long terminal repeat)    | 54,997          | 22,622,030         | 2.50%                  |
| LINE                             | 42,518          | 21,052,604         | 2.33 %                 |
| SINE                             | 12,479          | 1,569,426          | 0.17 %                 |
| LTR(Long terminal repeat)        | 254,934         | 239,794,862        | 26.53 %                |
| Gypsy                            | 133,600         | 124,472,322        | 13.77%                 |
| Copia                            | 86,958          | 81,164,557         | 8.98%                  |
| Other                            | 34,376          | 34,157,983         | 3.78%                  |
| <b>DNA elements</b>              | <b>211,061</b>  | <b>69,291,452</b>  | <b>7.67 %</b>          |
| <b>Unclassified TEs</b>          | <b>672,515</b>  | <b>178,395,949</b> | <b>19.74 %</b>         |
| Small RNA                        | 9,308           | 1,713,470          | 0.19 %                 |
| Satellites                       | 2,463           | 1,707,950          | 0.19 %                 |
| Simple repeats                   | 267,908         | 12,634,132         | 1.40 %                 |
| Low complexity                   | 40,422          | 1,967,278          | 0.22 %                 |
| <b>Total Repeats</b>             |                 | <b>526,123,083</b> | <b>58.21 %</b>         |



**Table S7.** Identification of simple sequence repeats in the *L. japonica* genome.

| Types    | Unit size | Cut-off | Number of SSR |
|----------|-----------|---------|---------------|
| Monomer  | 1         | 10      | 169,840       |
| Dimer    | 2         | 6       | 144,713       |
| Trimer   | 3         | 5       | 31,248        |
| Tetramer | 4         | 5       | 4,580         |
| Pentamer | 5         | 5       | 1,100         |
| Hexamer  | 6         | 5       | 566           |
| Total    |           |         | 352,047       |

**Table S8.** Annotation of *L. japonica* noncoding RNAs.

| ncRNA type | #Loci | Average length (bp) | Total length (bp) |
|------------|-------|---------------------|-------------------|
| miRNA      | 33    | 140                 | 4,636             |
| tRNA       | 104   | 74                  | 7,667             |
| rRNA(5S)   | 67    | 113                 | 7,590             |
| rRNA(18s)  | 28    | 1,781               | 49,860            |
| rRNA(28s)  | 43    | 6,118               | 263,076           |
| snoRNA     | 224   | 104                 | 23,319            |

**Table S9.** Annotation of *L. japonica* rRNAs.

| Chromosome | Start     | End       | Length |   | Type    |
|------------|-----------|-----------|--------|---|---------|
| chr1       | 34474202  | 34474306  | 104    | + | 8s_rRNA |
| chr1       | 122516099 | 122516207 | 108    | + | 8s_rRNA |
| chr2       | 64162129  | 64162242  | 113    | + | 8s_rRNA |
| chr2       | 86342440  | 86342553  | 113    | + | 8s_rRNA |
| chr2       | 92526438  | 92526554  | 116    | + | 8s_rRNA |
| chr2       | 122585188 | 122585292 | 104    | - | 8s_rRNA |
| chr3       | 11874047  | 11874161  | 114    | - | 8s_rRNA |
| chr3       | 23972697  | 23972811  | 114    | - | 8s_rRNA |
| chr3       | 23973008  | 23973122  | 114    | - | 8s_rRNA |
| chr3       | 23973323  | 23973428  | 105    | - | 8s_rRNA |
| chr3       | 23973929  | 23974051  | 122    | - | 8s_rRNA |
| chr3       | 23974235  | 23974354  | 119    | - | 8s_rRNA |
| chr3       | 23974398  | 23974513  | 115    | - | 8s_rRNA |
| chr3       | 23974557  | 23974670  | 113    | - | 8s_rRNA |
| chr3       | 23974835  | 23974949  | 114    | - | 8s_rRNA |
| chr3       | 23975080  | 23975214  | 134    | - | 8s_rRNA |
| chr3       | 30795452  | 30795563  | 111    | + | 8s_rRNA |
| chr3       | 38063103  | 38063215  | 112    | - | 8s_rRNA |
| chr3       | 48734666  | 48734793  | 127    | + | 8s_rRNA |
| chr3       | 89438304  | 89438403  | 99     | + | 8s_rRNA |
| chr4       | 7303357   | 7303471   | 114    | + | 8s_rRNA |
| chr6       | 27186749  | 27186856  | 107    | + | 8s_rRNA |
| chr8       | 1588027   | 1588139   | 112    | - | 8s_rRNA |
| chr8       | 51729395  | 51729503  | 108    | - | 8s_rRNA |
| chr8       | 52022298  | 52022410  | 112    | - | 8s_rRNA |
| chr8       | 52023205  | 52023319  | 114    | - | 8s_rRNA |
| chr8       | 52023500  | 52023616  | 116    | - | 8s_rRNA |
| chr8       | 52023776  | 52023886  | 110    | - | 8s_rRNA |
| chr8       | 52024034  | 52024148  | 114    | - | 8s_rRNA |
| chr8       | 52024483  | 52024593  | 110    | - | 8s_rRNA |
| chr8       | 52025378  | 52025493  | 115    | - | 8s_rRNA |
| chr8       | 52025662  | 52025774  | 112    | - | 8s_rRNA |
| chr8       | 52025850  | 52025995  | 145    | - | 8s_rRNA |
| chr8       | 52026669  | 52026780  | 111    | - | 8s_rRNA |
| chr8       | 52026946  | 52027060  | 114    | - | 8s_rRNA |
| chr8       | 52027493  | 52027607  | 114    | - | 8s_rRNA |
| chr8       | 52027775  | 52027889  | 114    | - | 8s_rRNA |
| chr8       | 52028266  | 52028380  | 114    | - | 8s_rRNA |
| chr8       | 52028518  | 52028632  | 114    | - | 8s_rRNA |
| chr8       | 52028782  | 52028895  | 113    | - | 8s_rRNA |

|         |           |           |      |   |          |
|---------|-----------|-----------|------|---|----------|
| chr8    | 52028991  | 52029104  | 113  | - | 8s_rRNA  |
| chr8    | 52029284  | 52029398  | 114  | - | 8s_rRNA  |
| chr8    | 52030084  | 52030198  | 114  | - | 8s_rRNA  |
| chr8    | 52030376  | 52030490  | 114  | - | 8s_rRNA  |
| chr8    | 52030679  | 52030791  | 112  | - | 8s_rRNA  |
| chr8    | 52031237  | 52031351  | 114  | - | 8s_rRNA  |
| chr8    | 52031512  | 52031626  | 114  | - | 8s_rRNA  |
| chr8    | 52031808  | 52031922  | 114  | - | 8s_rRNA  |
| chr8    | 52032093  | 52032206  | 113  | - | 8s_rRNA  |
| chr8    | 52032366  | 52032480  | 114  | - | 8s_rRNA  |
| chr8    | 52032656  | 52032770  | 114  | - | 8s_rRNA  |
| chr8    | 52032949  | 52033063  | 114  | - | 8s_rRNA  |
| chr8    | 52549827  | 52549935  | 108  | - | 8s_rRNA  |
| chr8    | 52857307  | 52857415  | 108  | - | 8s_rRNA  |
| chr9    | 4310114   | 4310225   | 111  | + | 8s_rRNA  |
| utg361  | 1688433   | 1688547   | 114  | + | 8s_rRNA  |
| utg891  | 386047    | 386159    | 112  | - | 8s_rRNA  |
| utg891  | 386344    | 386458    | 114  | - | 8s_rRNA  |
| utg891  | 386956    | 387067    | 111  | - | 8s_rRNA  |
| utg891  | 387260    | 387373    | 113  | - | 8s_rRNA  |
| utg891  | 387545    | 387655    | 110  | - | 8s_rRNA  |
| utg891  | 387830    | 387944    | 114  | - | 8s_rRNA  |
| utg891  | 388415    | 388529    | 114  | - | 8s_rRNA  |
| utg891  | 389000    | 389114    | 114  | - | 8s_rRNA  |
| utg891  | 389600    | 389704    | 104  | - | 8s_rRNA  |
| utg891  | 389881    | 389995    | 114  | - | 8s_rRNA  |
| utg891  | 390186    | 390297    | 111  | - | 8s_rRNA  |
| chr2    | 85550137  | 85551933  | 1796 | + | 18s_rRNA |
| chr2    | 85560285  | 85563175  | 2890 | + | 18s_rRNA |
| chr2    | 88033564  | 88035660  | 2096 | + | 18s_rRNA |
| chr2    | 122585463 | 122587377 | 1914 | - | 18s_rRNA |
| chr2    | 122615151 | 122617063 | 1912 | + | 18s_rRNA |
| chr2    | 123845191 | 123846676 | 1485 | + | 18s_rRNA |
| chr2    | 123988057 | 123989534 | 1477 | - | 18s_rRNA |
| chr6    | 11504747  | 11506502  | 1755 | - | 18s_rRNA |
| chr6    | 11973995  | 11975757  | 1762 | - | 18s_rRNA |
| chr9    | 8265      | 10025     | 1760 | + | 18s_rRNA |
| chr9    | 36195     | 37963     | 1768 | + | 18s_rRNA |
| utg1953 | 8878      | 10622     | 1744 | - | 18s_rRNA |
| utg1953 | 17124     | 18846     | 1722 | - | 18s_rRNA |
| utg1953 | 24979     | 26715     | 1736 | - | 18s_rRNA |
| utg1953 | 33057     | 34802     | 1745 | - | 18s_rRNA |
| utg1953 | 41004     | 42758     | 1754 | - | 18s_rRNA |
| utg1953 | 49132     | 50868     | 1736 | - | 18s_rRNA |

|         |           |           |      |   |          |
|---------|-----------|-----------|------|---|----------|
| utg1953 | 56969     | 58733     | 1764 | - | 18s_rRNA |
| utg1953 | 65174     | 66910     | 1736 | - | 18s_rRNA |
| utg1953 | 85537     | 87046     | 1509 | - | 18s_rRNA |
| utg41   | 6258158   | 6259965   | 1807 | - | 18s_rRNA |
| utg41   | 6268341   | 6270099   | 1758 | - | 18s_rRNA |
| utg470  | 22806     | 24613     | 1807 | + | 18s_rRNA |
| utg5009 | 29708     | 31187     | 1479 | + | 18s_rRNA |
| utg8921 | 13213     | 14938     | 1725 | + | 18s_rRNA |
| utg8921 | 22056     | 23808     | 1752 | + | 18s_rRNA |
| utg8921 | 39904     | 41624     | 1720 | + | 18s_rRNA |
| utg8921 | 63122     | 64873     | 1751 | + | 18s_rRNA |
| chr2    | 85552158  | 85560213  | 8055 | + | 28s_rRNA |
| chr2    | 85780408  | 85785391  | 4983 | + | 28s_rRNA |
| chr2    | 88027984  | 88033600  | 5616 | + | 28s_rRNA |
| chr2    | 88047225  | 88052588  | 5363 | + | 28s_rRNA |
| chr2    | 113287754 | 113291928 | 4174 | + | 28s_rRNA |
| chr2    | 123849111 | 123855522 | 6411 | + | 28s_rRNA |
| chr2    | 123982156 | 123985633 | 3477 | - | 28s_rRNA |
| chr9    | 870       | 7522      | 6652 | + | 28s_rRNA |
| chr9    | 10237     | 17118     | 6881 | + | 28s_rRNA |
| chr9    | 19806     | 26447     | 6641 | + | 28s_rRNA |
| chr9    | 29159     | 36059     | 6900 | + | 28s_rRNA |
| chr9    | 38169     | 45217     | 7048 | + | 28s_rRNA |
| utg1953 | 2290      | 8669      | 6379 | - | 28s_rRNA |
| utg1953 | 11546     | 16914     | 5368 | - | 28s_rRNA |
| utg1953 | 19768     | 24768     | 5000 | - | 28s_rRNA |
| utg1953 | 26683     | 32836     | 6153 | - | 28s_rRNA |
| utg1953 | 34769     | 40780     | 6011 | - | 28s_rRNA |
| utg1953 | 43678     | 48914     | 5236 | - | 28s_rRNA |
| utg1953 | 51796     | 56750     | 4954 | - | 28s_rRNA |
| utg1953 | 58701     | 64964     | 6263 | - | 28s_rRNA |
| utg1953 | 67845     | 75163     | 7318 | - | 28s_rRNA |
| utg1953 | 87013     | 93863     | 6850 | - | 28s_rRNA |
| utg1953 | 97006     | 102284    | 5278 | - | 28s_rRNA |
| utg225  | 278818    | 285831    | 7013 | - | 28s_rRNA |
| utg41   | 6252104   | 6257923   | 5819 | - | 28s_rRNA |
| utg41   | 6261105   | 6268112   | 7007 | - | 28s_rRNA |
| utg41   | 6271111   | 6278195   | 7084 | - | 28s_rRNA |
| utg427  | 300266    | 307163    | 6897 | + | 28s_rRNA |
| utg470  | 9440      | 15311     | 5871 | + | 28s_rRNA |
| utg470  | 24848     | 30180     | 5332 | + | 28s_rRNA |
| utg50   | 227329    | 231299    | 3970 | + | 28s_rRNA |
| utg50   | 2718098   | 2721775   | 3677 | + | 28s_rRNA |
| utg5009 | 33618     | 37108     | 3490 | + | 28s_rRNA |

|         |       |       |      |   |          |
|---------|-------|-------|------|---|----------|
| utg8921 | 6291  | 13246 | 6955 | + | 28s_rRNA |
| utg8921 | 15154 | 22089 | 6935 | + | 28s_rRNA |
| utg8921 | 24003 | 31024 | 7021 | + | 28s_rRNA |
| utg8921 | 32917 | 39937 | 7020 | + | 28s_rRNA |
| utg8921 | 41826 | 48744 | 6918 | + | 28s_rRNA |
| utg8921 | 56156 | 63155 | 6999 | + | 28s_rRNA |
| utg8921 | 65087 | 72079 | 6992 | + | 28s_rRNA |
| utg8921 | 73971 | 80960 | 6989 | + | 28s_rRNA |
| utg8921 | 82855 | 89905 | 7050 | + | 28s_rRNA |
| utg8921 | 91803 | 98829 | 7026 | + | 28s_rRNA |

**Table S10.** Location of MIR2911 in genome.

|         | Chromosomes | Position |
|---------|-------------|----------|
| MIR2911 | Chr6        | 11980227 |
| MIR2911 | Chr4        | 87400607 |
| MIR2911 | Chr2        | 48586293 |

**Table S12.**  $K_s$  distributions of orthologous and paralogous genes among *L. japonica*, *C. nankingense*, *L. sativa*, and *C. canephora*.

| Species       | Species       | $K_s$ peak 1 | Density   | Divergence time for speciation (MYA) | Synonymous substitutions per site per MYA |
|---------------|---------------|--------------|-----------|--------------------------------------|-------------------------------------------|
| Chrysanthemum | Chrysanthemum | 0.117409     | 1.275659  | 0                                    |                                           |
| Chrysanthemum | Honeysuckle   | 1.3971671    | 0.7090722 | 87.345029                            | 0.007997977                               |
| Coffee        | Coffee        | 2.2072892    | 0.4131199 | 0                                    |                                           |
| Honeysuckle   | Coffee        | 1.2797581    | 0.9856402 | 97.963607                            | 0.006531804                               |
| Honeysuckle   | Honeysuckle   | 0.7866403    | 1.050899  | 0                                    |                                           |
| Honeysuckle   | Lettuce       | 1.4793534    | 0.6471449 | 87.345029                            | 0.008468447                               |
| Lettuce       | Lettuce       | 1.0214583    | 1.141869  | 0                                    |                                           |
| Mean          |               |              |           |                                      | 0.007666076                               |

**Table S13.** Mining and expression analysis of *L. japonica* carotenogenesis genes.

| Gene <sup>1</sup> | Gene <sup>2</sup> | Accession <sup>3</sup> | Identity | Gene_ID     | Location                 | JB    | GB     | WB     | SF     | GF      | TWF <sup>4</sup> |
|-------------------|-------------------|------------------------|----------|-------------|--------------------------|-------|--------|--------|--------|---------|------------------|
| <i>LjPSY1</i>     | <i>AtPSY</i>      | AT5G17230              | 83.768   | Lj4C251T7   | chr4:25122945-25126671   | 12.87 | 13.15  | 15.17  | 20.60  | 2005.33 | 2494.88          |
| <i>LjPSY2</i>     | <i>AtPSY</i>      | AT5G17230              | 84.615   | Lj8C97G11   | chr8:9759952-9763473     | 8.80  | 16.01  | 10.82  | 1.44   | 1.38    | 0.69             |
| <i>LjPSY3</i>     | <i>AtPSY</i>      | AT5G17230              | 73.394   | Lj2C511G6   | chr2:51118195-51130069   | 33.01 | 24.63  | 25.37  | 20.39  | 127.88  | 188.97           |
| <i>LjPSY4</i>     | <i>AtPSY</i>      | AT5G17230              | 71.538   | Lj2C707G6   | chr2:70784483-70787590   | 0.00  | 0.00   | 0.00   | 0.00   | 0.00    | 0.00             |
| <i>LjPSY5</i>     | <i>AtPSY</i>      | AT5G17230              | 66.409   | Lj2A718G15  | chr2:71825303-71827477   | 0.00  | 0.00   | 0.00   | 0.00   | 0.00    | 0.00             |
| <i>LjPDS1</i>     | <i>AtPDS1</i>     | AT1G06570              | 70.115   | Lj8C8T1     | chr8:795491-797804       | 83.00 | 62.78  | 93.70  | 993.95 | 1124.88 | 1873.35          |
| <i>LjPDS2</i>     | <i>AtPDS2</i>     | AT3G11945              | 73.968   | Lj2C359T6   | chr2:35966798-35973274   | 8.57  | 6.44   | 7.55   | 8.51   | 10.47   | 7.66             |
| <i>LjPDS3</i>     | <i>AtPDS3</i>     | AT4G14210              | 80       | Lj9A539T91  | chr9:53967053-53972482   | 70.57 | 100.68 | 142.18 | 858.63 | 1760.72 | 1795.51          |
| <i>LjZ-ISO1</i>   | <i>AtZ-ISO</i>    | AT1G10830              | 82.456   | Lj3A376T54  | chr3:37623104-37624999   | 10.45 | 12.09  | 26.51  | 205.27 | 235.74  | 210.68           |
| <i>LjZ-ISO2</i>   | <i>AtZ-ISO</i>    | AT1G10830              | 81.215   | Lj3A357T51  | chr3:35727716-35728899   | 5.98  | 10.33  | 18.87  | 228.38 | 256.93  | 235.46           |
| <i>LjZDS1</i>     | <i>AtZDS</i>      | AT3G04870              | 83.21    | Lj9A669T11  | chr9:66972168-66982409   | 26.45 | 54.95  | 89.01  | 110.33 | 265.16  | 321.76           |
| <i>LjZDS2</i>     | <i>AtZDS</i>      | AT3G04870              | 83.21    | Lj9A666T47  | chr9:66615468-66624762   | 19.08 | 33.36  | 54.13  | 58.96  | 176.89  | 195.75           |
| <i>LjCRTISO1</i>  | <i>AtCRTISO1</i>  | AT1G06820              | 78.12    | Lj1A1059G39 | chr1:105932098-105947433 | 10.84 | 15.17  | 15.79  | 2.69   | 4.59    | 3.00             |
| <i>LjCRTISO2</i>  | <i>AtCRTISO2</i>  | AT1G57770              | 78.395   | Lj5C267G12  | chr5:26749800-26758240   | 6.58  | 4.79   | 6.41   | 6.02   | 11.12   | 7.67             |
| <i>LjLCYB</i>     | <i>AtLCYB</i>     | AT3G10230              | 57.461   | Lj1P256T46  | chr1:25684897-25686385   | 39.38 | 104.41 | 138.20 | 909.30 | 1287.31 | 845.44           |
| <i>LjLCYE</i>     | <i>AtLCYE</i>     | AT5G57030              | 62.075   | Lj4A290G39  | chr4:29044891-29057495   | 15.10 | 3.08   | 1.72   | 0.46   | 2.12    | 4.92             |

|                  |                  |           |        |             |                          |        |        |        |         |         |         |
|------------------|------------------|-----------|--------|-------------|--------------------------|--------|--------|--------|---------|---------|---------|
| <i>LjBCH</i>     | <i>AtBCH1</i>    | AT4G25700 | 69.204 | Lj1A1004T81 | chr1:100480495-100483995 | 83.77  | 113.36 | 164.31 | 1060.97 | 1154.84 | 2266.04 |
|                  | <i>AtBCH2</i>    | AT5G52570 | 68.942 | Lj1A1004T81 |                          |        |        |        |         |         |         |
| <i>LjZEP</i>     | <i>AtZEP</i>     | AT5G67030 | 71.54  | Lj4C149T12  | chr4:14948117-14953170   | 48.42  | 58.99  | 135.48 | 365.60  | 305.18  | 112.32  |
| <i>LjNSY</i>     | <i>AtNSY</i>     | AT1G67080 | 69.73  | Lj2A442G45  | chr2:44202073-44203474   | 313.58 | 584.76 | 854.88 | 888.26  | 315.72  | 70.57   |
| <i>LjCYP97A3</i> | <i>AtCYP97A3</i> | AT1G31800 | 77.076 | Lj2C52G4    | chr2:5199239-5206023     | 26.50  | 28.14  | 27.77  | 16.74   | 50.42   | 55.26   |
| <i>LjCYP97C1</i> | <i>AtCYP97C1</i> | AT3G53130 | 74.725 | Lj3A994T59  | chr3:99482420-99489205   | 21.88  | 24.45  | 26.25  | 39.11   | 52.68   | 57.70   |
| <i>LjCYP97B3</i> | <i>AtCYP97B3</i> | AT4G15110 | 78.237 | Lj1A1044G23 | chr1:104379355-104390723 | 14.19  | 11.52  | 9.48   | 11.00   | 11.34   | 4.75    |
| <i>LjNCED3</i>   | <i>AtNCED3</i>   | AT3G14440 | 81.276 | Lj1P809T13  | chr1:80909801-80911337   | 69.68  | 51.52  | 77.73  | 573.36  | 235.59  | 1220.64 |

Gene<sup>1</sup>, *L. japonica* gene

Gene<sup>2</sup>, *A. thaliana* gene

Accession<sup>3</sup>, Arabidopsis gene Accession

TWF<sup>4</sup>, Juvenile bud, JB. Green bud, GB. White bud, WB. Silver flower, SF. Golden flower, GF. Tawny withering flower, TWF.



**Table S14.** Mining and expression analysis of *L. japonica* CCD genes.

| Gene           | Gene_ID    | Location               | JB     | GB    | WB    | SF    | GF    | TWF <sup>1</sup> |
|----------------|------------|------------------------|--------|-------|-------|-------|-------|------------------|
| <i>LjCCD1a</i> | Lj9C633G15 | chr9:63351139-63364265 | 0.04   | 0.06  | 0.04  | 0.00  | 0.00  | 0.06             |
| <i>LjCCD1b</i> | Lj7C571T11 | chr7:57170156-57180723 | 43.52  | 67.96 | 89.40 | 41.14 | 44.36 | 17.84            |
| <i>LjCCD1L</i> | Lj7C703T4  | chr7:70304945-70312220 | 0.06   | 0.00  | 0.00  | 0.71  | 0.00  | 0.11             |
| <i>LjCCD4</i>  | Lj7A208T26 | chr7:20793476-20797709 | 125.49 | 58.97 | 44.43 | 10.06 | 1.78  | 3.19             |
| <i>LjCCD7</i>  | Lj7C540G12 | chr7:54038462-54051909 | 1.04   | 1.88  | 1.02  | 1.29  | 0.74  | 0.52             |
| <i>LjCCD8a</i> | Lj8A581T28 | chr8:58181148-58184306 | 0.16   | 0.32  | 0.08  | 0.00  | 0.00  | 0.00             |
| <i>LjCCD8b</i> | Lj7A701T19 | chr7:70094945-70098505 | 0.00   | 0.00  | 0.00  | 0.00  | 0.00  | 0.00             |

TWF<sup>1</sup>, Juvenile bud, JB. Green bud, GB. White bud, WB. Silver flower, SF. Golden flower, GF. Tawny withering flower, TWF.

**Table S15.** Primers used for cloning *LjCCD4*.

| Gene            | Primer                 |
|-----------------|------------------------|
| <i>LjCCD4-F</i> | ATGGATGCCCTCTCCTCTTCTT |
| <i>LjCCD4-R</i> | CCGCCGTTACAATTTATTGAGG |
